# Supplementary material for: New phiomorph rodents from the latest Eocene of Egypt, and the impact of Bayesian “clock”-based phylogenetic methods on estimates of basal hystricognath relationships and biochronology
Source: PeerJ. 2016 Mar 1;4:e1717. doi: 10.7717/peerj.1717 (PMC4782727; doi:10.7717/peerj.1717)
Supplement: Dataset S4 [file peerj-04-1717-s005.xlsx]

## Sheet: Sallam_Seiffert_Dataset_S4.txt
Taxon	ln(m1 area)
Acritophiomys_bowni	1.19
Anadianomys_declivis	0.796
Baluchimys_ganeshapher	0.986
Birbalomys_woodi	1.627
Birkamys_korai	-0.043
Bugtimys_zafarullahi	1.944
Canaanimys_maquiensis	0.883
Confiniummys_sidiki	0.821
Gaudeamus_aegyptius	1.179
Gaudeamus_aslius	1.498
Gaudeamus_hylaeus	1.493
Hodsahibia_gracilis	1.254
Lindsaya_derabugtiensis	0.591
Lophibaluchia_pilbeami	0.932
Metaphiomys_beadnelli	1.735
Mubhammys_vadumensis	1.253
Neophiomys_paraphiomyoides	0.618
Ottomania_proavita	1.335
Paraphiomys_simonsi	2.353
Petrokozlovia_notos	2.406
Phiocricetomys_minutus	-0.207
Phiomys_andrewsi	0.563
Phiomys_hammudai	1.438
Phiomys_lavocati	0.048
Prepomonomys_bogenfelsi	1.828
Protophiomys_tunisiensis	0.818
Protophiomys_aegyptensis	1.024
Protophiomys_algeriensis	0.895
Protophiomys_durattalahensis	0.777
Talahphiomys_lavocati	0.275
Tsaganomys_altaicus	3.119
Turkanamys_hexalophus	1.732
Waslamys_attiai	0.971
Yuomys_cavioides	2.502
