# Supplementary material for: New phiomorph rodents from the latest Eocene of Egypt, and the impact of Bayesian “clock”-based phylogenetic methods on estimates of basal hystricognath relationships and biochronology
Source: PeerJ. 2016 Mar 1;4:e1717. doi: 10.7717/peerj.1717 (PMC4782727; doi:10.7717/peerj.1717)
Supplement: Dataset S6 [file peerj-04-1717-s011.xlsx]

## Sheet: Sheet1
Node #	Random walk (RW) model mean	RW 95% HPD lower	RW 95% HPD upper	Directional (D) model mean	D 95% HPD lower	D 95% HPD upper
1	0.5887	0.5885	0.5889	0.4805	0.4803	0.4807
2	1.2317	0.5985	1.8594	0.9585	0.3496	1.5688
3	1.9516	1.3019	2.6034	1.6415	0.9262	2.3941
4	1.1098	0.4092	1.8505	0.8404	0.1445	1.5648
5	1.0155	0.279	1.7513	0.7422	-0.0841	1.5625
6	1.0211	0.2579	1.8092	0.6759	-0.1773	1.5679
7	1.4654	0.4505	2.5095	1.1063	-0.0751	2.3367
8	1.1799	0.2238	2.1479	1.0028	-0.2074	2.2406
9	0.9832	0.084495	1.9335	0.9651	-0.2981	2.2897
10	1.1004	0.2183	2.0024	1.1156	-0.2257	2.4431
11	1.0469	0.3205	1.8077	0.9944	0.2243	1.7649
12	0.8904	0.07321	1.6825	0.8577	0.064754	1.7177
13	0.4384	-0.5249	1.4355	0.4161	-0.5254	1.4366
14	0.1614	-0.9554	1.2516	0.1542	-0.9533	1.2255
15	1.0649	0.2765	1.8397	1.0216	0.194	1.8091
16	1.0492	0.1902	1.8509	1.0225	0.1536	1.8472
17	1.0323	0.2012	1.8728	1.0087	0.151	1.8472
18	1.1859	0.139	2.2376	1.1655	0.1574	2.2785
19	1.384	0.2805	2.5113	1.3831	0.2413	2.482
20	1.1068	0.3077	1.9114	1.0696	0.2305	1.8719
21	1.2978	0.3133	2.2163	1.2904	0.2943	2.1945
22	1.3117	0.3282	2.2707	1.3139	0.3247	2.27
23	1.0976	0.2863	1.904	1.0622	0.2271	1.8868
24	1.05	0.2113	1.8909	1.0214	0.1614	1.8519
25	1.1566	0.3045	2.0063	1.1262	0.2664	2.0048
26	1.1482	0.2484	1.9711	1.1194	0.2372	1.9812
27	1.0757	0.2105	1.9666	1.0476	0.1754	1.9434
28	0.9718	0.08349	1.8985	0.9461	0.049229	1.8597
29	0.935	0.028633	1.8844	0.9077	-0.0269	1.8242
30	0.8714	-0.0468	1.8373	0.8553	-0.073	1.7866
31	1.1397	0.1099	2.1801	1.1175	0.1186	2.1905
32	1.5429	0.4132	2.6182	1.5382	0.4572	2.6441
33	1.6968	0.4943	2.8083	1.6986	0.5491	2.8654
